# Supplementary material for: Association of Health Insurance Literacy With Enrollment in Traditional Medicare, Medicare Advantage, and Plan Characteristics Within Medicare Advantage
Source: PubMed Central journal article supplement (PMC8814909; doi:10.1001/jamanetworkopen.2021.46792), 2022-02-03
Supplement: jamanetwopen-e2146792-s001.pdf [file jamanetwopen-e2146792-s001.pdf]

## Supplemental Online Content

Park S, Langellier BA, Meyers DJ. Association of health insurance literacy with enrollment in traditional Medicare, Medicare Advantage, and plan characteristics within Medicare Advantage. *JAMA Netw Open*. 2022;5(2):e2146792. doi:10.1001/jamanetworkopen.2021.46792

**eTable 1.** Results From Linear Probability Models of Enrollment in Medicare Advantage (MA)

**eTable 2.** Sample Characteristics After Applying Inverse Probability of Treatment Weighting

**eTable 3.** Adjusted Rates of Enrollment in Medicare Advantage (MA) With and Without Inverse Probability of Treatment Weighting (IPTW)

**eTable 4.** Results From Conditional Logistic Regression of Enrollment in Medicare Advantage (MA)

This supplemental material has been provided by the authors to give readers additional information about their work.

**eTable 1.** Results From Linear Probability Models of Enrollment in Medicare Advantage (MA)

| Variable                                                                                              | MA enrollment, OR (95% CI) |                            |                            |
|-------------------------------------------------------------------------------------------------------|----------------------------|----------------------------|----------------------------|
|                                                                                                       | Model 1                    | Model 2                    | Model 3                    |
| I have the information I need to make an informed comparison among different health insurance choices |                            |                            |                            |
| Disagree                                                                                              | REF                        |                            |                            |
| Agree                                                                                                 | <b>1.32 (1.09 to 1.6)</b>  |                            |                            |
| How easy would you say it is for you to review and compare your Medicare coverage options?            |                            |                            |                            |
| Difficult                                                                                             |                            | REF                        |                            |
| Easy                                                                                                  |                            | <b>1.22 (1.04 to 1.43)</b> |                            |
| How often do you review or compare your Medicare coverage options?                                    |                            |                            |                            |
| Less than annually                                                                                    |                            |                            | REF                        |
| Annually                                                                                              |                            |                            | <b>1.72 (1.47 to 2.01)</b> |
| Age                                                                                                   |                            |                            |                            |
| <65                                                                                                   | REF                        | REF                        | REF                        |
| 65-70                                                                                                 | 1.24 (0.91 to 1.67)        | 1.26 (0.93 to 1.7)         | 1.27 (0.93 to 1.72)        |
| 71-75                                                                                                 | <b>1.33 (1 to 1.78)</b>    | <b>1.35 (1.01 to 1.8)</b>  | <b>1.36 (1.01 to 1.82)</b> |
| 76-80                                                                                                 | 1.18 (0.88 to 1.6)         | 1.2 (0.89 to 1.62)         | 1.22 (0.9 to 1.65)         |
| >80                                                                                                   | 1.15 (0.87 to 1.54)        | 1.17 (0.88 to 1.56)        | 1.23 (0.92 to 1.64)        |
| Female                                                                                                | 1.12 (0.96 to 1.32)        | 1.13 (0.96 to 1.33)        | 1.11 (0.94 to 1.31)        |
| Race/ethnicity                                                                                        |                            |                            |                            |
| Non-Hispanic White                                                                                    | REF                        | REF                        | REF                        |
| Non-Hispanic Black                                                                                    | 0.99 (0.77 to 1.29)        | 0.99 (0.76 to 1.28)        | 0.99 (0.76 to 1.28)        |
| Non-Hispanic Asian                                                                                    | 0.51 (0.24 to 1.09)        | 0.49 (0.22 to 1.06)        | 0.53 (0.25 to 1.13)        |
| Hispanic                                                                                              | <b>1.37 (1.02 to 1.85)</b> | <b>1.37 (1.02 to 1.84)</b> | <b>1.4 (1.03 to 1.9)</b>   |
| Others                                                                                                | <b>1.54 (1 to 2.38)</b>    | <b>1.54 (1 to 2.37)</b>    | <b>1.52 (1 to 2.3)</b>     |
| Education                                                                                             |                            |                            |                            |
| Less than high school                                                                                 | REF                        | REF                        | REF                        |
| High school completion                                                                                | 1 (0.81 to 1.24)           | 0.99 (0.8 to 1.23)         | 0.97 (0.78 to 1.21)        |
| College degree and greater                                                                            | <b>0.78 (0.62 to 0.98)</b> | <b>0.78 (0.62 to 0.98)</b> | <b>0.75 (0.6 to 0.95)</b>  |
| Income                                                                                                |                            |                            |                            |
| Less than \$25,000                                                                                    | REF                        | REF                        | REF                        |
| \$25,000-\$40,000                                                                                     | <b>0.78 (0.64 to 0.95)</b> | <b>0.79 (0.65 to 0.96)</b> | <b>0.8 (0.65 to 0.97)</b>  |

|                                            |                            |                            |                            |
|--------------------------------------------|----------------------------|----------------------------|----------------------------|
| More than \$40,000                         | <b>0.47 (0.38 to 0.59)</b> | <b>0.47 (0.38 to 0.59)</b> | <b>0.47 (0.38 to 0.59)</b> |
| Dual eligibility                           | <b>0.46 (0.35 to 0.61)</b> | <b>0.47 (0.35 to 0.62)</b> | <b>0.48 (0.36 to 0.64)</b> |
| Married                                    | <b>1.32 (1.11 to 1.56)</b> | <b>1.33 (1.12 to 1.58)</b> | <b>1.31 (1.1 to 1.55)</b>  |
| Self-reported comorbidity                  |                            |                            |                            |
| Hardening of arteries                      | 1.05 (0.8 to 1.38)         | 1.05 (0.8 to 1.37)         | 1.04 (0.79 to 1.36)        |
| Hypertension                               | 0.9 (0.75 to 1.07)         | 0.9 (0.75 to 1.07)         | 0.89 (0.75 to 1.07)        |
| Myocardial infarction                      | <b>1.33 (1.01 to 1.74)</b> | <b>1.32 (1.01 to 1.73)</b> | <b>1.33 (1.02 to 1.75)</b> |
| Stroke                                     | 1.25 (0.98 to 1.6)         | 1.25 (0.97 to 1.59)        | 1.25 (0.97 to 1.6)         |
| Coronary heart disease                     | 1.19 (0.91 to 1.55)        | 1.19 (0.92 to 1.55)        | 1.14 (0.87 to 1.48)        |
| Cancer                                     | <b>0.84 (0.71 to 0.98)</b> | <b>0.83 (0.71 to 0.98)</b> | <b>0.84 (0.72 to 0.99)</b> |
| Rheumatoid arthritis                       | 0.86 (0.69 to 1.06)        | 0.86 (0.69 to 1.06)        | 0.84 (0.68 to 1.04)        |
| Diabetes                                   | 1.07 (0.89 to 1.28)        | 1.07 (0.89 to 1.28)        | 1.06 (0.88 to 1.27)        |
| Alzheimer's disease and related dementias  | 0.99 (0.66 to 1.51)        | 1 (0.66 to 1.52)           | 1 (0.67 to 1.51)           |
| Mental illness                             | 0.97 (0.81 to 1.17)        | 0.97 (0.81 to 1.17)        | 0.97 (0.81 to 1.17)        |
| General perceived health status            |                            |                            |                            |
| Good                                       | REF                        | REF                        | REF                        |
| Poor                                       | 1.17 (0.94 to 1.46)        | 1.16 (0.94 to 1.45)        | 1.16 (0.93 to 1.45)        |
| Number of ADL limitations                  |                            |                            |                            |
| 0                                          | REF                        | REF                        | REF                        |
| 1-2                                        | 0.94 (0.78 to 1.14)        | 0.94 (0.78 to 1.14)        | 0.94 (0.78 to 1.13)        |
| More than 3                                | 0.86 (0.68 to 1.1)         | 0.86 (0.68 to 1.1)         | 0.87 (0.68 to 1.11)        |
| Number of MA plans                         | 0.99 (0.91 to 1.08)        | 0.99 (0.91 to 1.08)        | 0.99 (0.91 to 1.08)        |
| Number of MA plans by star rating          |                            |                            |                            |
| 2-2.5 stars                                | 0.99 (0.86 to 1.14)        | 1 (0.86 to 1.15)           | 1 (0.87 to 1.15)           |
| 3-3.5 stars                                | 0.99 (0.92 to 1.07)        | 0.99 (0.92 to 1.07)        | 1 (0.92 to 1.08)           |
| 4-4.5 stars                                | 1.04 (0.96 to 1.12)        | 1.04 (0.96 to 1.13)        | 1.05 (0.97 to 1.14)        |
| 5 stars                                    | REF                        | REF                        | REF                        |
| Number of MA plans by plan type            |                            |                            |                            |
| HMO                                        | 1.01 (0.95 to 1.07)        | 1.01 (0.95 to 1.07)        | 1 (0.95 to 1.06)           |
| Local PPO                                  | 1.03 (0.97 to 1.09)        | 1.03 (0.97 to 1.09)        | 1.02 (0.97 to 1.08)        |
| Regional PPO                               | 0.98 (0.87 to 1.1)         | 0.98 (0.87 to 1.1)         | 0.96 (0.85 to 1.08)        |
| Other                                      | REF                        | REF                        | REF                        |
| Number of MA plans by monthly plan premium |                            |                            |                            |
| \$0                                        | <b>1.06 (1.01 to 1.11)</b> | <b>1.06 (1 to 1.11)</b>    | <b>1.06 (1.01 to 1.11)</b> |
| >\$0-\$50                                  | 0.99 (0.93 to 1.05)        | 0.99 (0.93 to 1.06)        | 0.99 (0.93 to 1.06)        |
| >\$50-\$100                                | 0.97 (0.89 to 1.05)        | 0.97 (0.89 to 1.05)        | 0.96 (0.88 to 1.05)        |
| >\$100                                     | REF                        | REF                        | REF                        |

|                                                   |                            |                            |                            |
|---------------------------------------------------|----------------------------|----------------------------|----------------------------|
| Nubmer of MA plans by maximum out-of-pocket limit |                            |                            |                            |
| \$0-\$3,000                                       | <b>1.19 (1.11 to 1.28)</b> | <b>1.19 (1.11 to 1.28)</b> | <b>1.18 (1.1 to 1.27)</b>  |
| >\$3,000-\$4,500                                  | 0.98 (0.95 to 1.01)        | 0.98 (0.95 to 1.01)        | 0.97 (0.94 to 1)           |
| >\$4,500-\$6,000                                  | <b>1.12 (1.07 to 1.18)</b> | <b>1.12 (1.07 to 1.18)</b> | <b>1.12 (1.07 to 1.18)</b> |
| >\$6,000                                          | REF                        | REF                        | REF                        |
| Baseline year                                     |                            |                            |                            |
| 2015                                              | REF                        | REF                        | REF                        |
| 2016                                              | 0.98 (0.84 to 1.16)        | 0.99 (0.84 to 1.16)        | 0.99 (0.84 to 1.16)        |

Abbreviation: MA, Medicare Advantage; ADL, activities of daily living; HMO, health maintenance organization; PPO, preferred provider organization.

Bold indicates statistically significant differences ( $p < 0.05$ ).

**eTable 2.** Sample Characteristics After Applying Inverse Probability of Treatment Weighting

| Characteristic                                                                           | TM enrollees | MA enrollees |
|------------------------------------------------------------------------------------------|--------------|--------------|
| <i>Individual-level characteristics of demographic, socioeconomic, and health status</i> |              |              |
| Age, %                                                                                   |              |              |
| <65                                                                                      | 15.6         | 14.9         |
| 65-70                                                                                    | 27.7         | 29.0         |
| 71-75                                                                                    | 21.9         | 23.8         |
| 76-80                                                                                    | 15.7         | 15.4         |
| >80                                                                                      | 19.1         | 16.8         |
| Female, %                                                                                | 55.9         | 56.1         |
| Race/ethnicity, %                                                                        |              |              |
| Non-Hispanic White                                                                       | 79.0         | 78.1         |
| Non-Hispanic Black                                                                       | 11.0         | 11.4         |
| Non-Hispanic Asian                                                                       | 1.8          | 2.1          |
| Hispanic                                                                                 | 7.3          | 7.2          |
| Others                                                                                   | 3.5          | 3.4          |
| Education, %                                                                             |              |              |
| Less than high school                                                                    | 13.6         | 13.8         |
| High school completion                                                                   | 36.3         | 36.1         |
| College degree and greater                                                               | 49.8         | 49.9         |
| Income, %                                                                                |              |              |
| Less than \$25,000                                                                       | 38.7         | 38.8         |
| \$25,000-\$40,000                                                                        | 28.8         | 28.7         |
| More than \$40,000                                                                       | 32.6         | 32.5         |
| Dual eligibility, %                                                                      | 13.3         | 13.8         |
| Married, %                                                                               | 54.7         | 54.5         |
| Self-reported comorbidity, %                                                             |              |              |
| Hardening of arteries                                                                    | 10.4         | 10.1         |
| Hypertension                                                                             | 67.1         | 66.9         |
| Myocardial infarction                                                                    | 11.7         | 11.9         |
| Stroke                                                                                   | 10.3         | 10.3         |
| Coronary heart disease                                                                   | 11.1         | 10.9         |
| Cancer                                                                                   | 33.7         | 33.7         |
| Rheumatoid arthritis                                                                     | 16.6         | 17.5         |
| Diabetes                                                                                 | 31.5         | 32.6         |
| Alzheimer's disease and related dementias                                                | 2.9          | 3.0          |

|                                                         |            |            |
|---------------------------------------------------------|------------|------------|
| Mental illness                                          | 30.2       | 29.6       |
| General perceived health status, %                      |            |            |
| Good                                                    | 78.6       | 78.6       |
| Poor                                                    | 21.4       | 21.4       |
| Number of ADL limitations, %                            |            |            |
| 0                                                       | 59.9       | 60.0       |
| 1-2                                                     | 22.9       | 22.6       |
| More than 3                                             | 17.2       | 17.5       |
| <i>County-level characteristics of MA plan offering</i> |            |            |
| Total number of MA plans, mean (SD)                     | 12.9 (8.0) | 13.0 (7.1) |
| Star rating, mean (SD)                                  |            |            |
| 2-2.5 stars                                             | 0.2 (0.6)  | 0.2 (0.6)  |
| 3-3.5 stars                                             | 5.1 (5.3)  | 5.2 (4.9)  |
| 4-4.5 stars                                             | 7.1 (5.3)  | 7.1 (5.1)  |
| 5 stars                                                 | 0.4 (1.1)  | 0.4 (1.1)  |
| Plan type, mean (SD)                                    |            |            |
| HMO                                                     | 7.8 (7.3)  | 7.9 (6.4)  |
| Local PPO                                               | 3.2 (2.8)  | 3.2 (2.8)  |
| Regional PPO                                            | 1.4 (1.2)  | 1.4 (1.3)  |
| Other                                                   | 0.5 (1.9)  | 0.4 (2.0)  |
| Monthly plan premium, mean (SD)                         |            |            |
| \$0                                                     | 4.4 (5.3)  | 4.5 (4.7)  |
| >\$0-\$50                                               | 3.1 (2.7)  | 3.1 (2.5)  |
| >\$50-\$100                                             | 2.5 (1.7)  | 2.5 (1.6)  |
| >\$100                                                  | 2.9 (2.8)  | 2.8 (2.8)  |
| Maximum out-of-pocket limit, mean (SD)                  |            |            |
| \$0-\$3,000                                             | 0.7 (1.5)  | 0.6 (1.5)  |
| >\$3,000-\$4,500                                        | 4.2 (4.2)  | 4.2 (3.8)  |
| >\$4,500-\$6,000                                        | 2.4 (2.0)  | 2.4 (2.0)  |
| >\$6,000                                                | 5.7 (4.6)  | 5.7 (4.4)  |

Abbreviation: TM, traditional Medicare; MA, Medicare Advantage; ADL, activities of daily living; HMO, health maintenance organization; PPO, preferred provider organization.

**eTable 3.** Adjusted Rates of Enrollment in Medicare Advantage (MA) With and Without Inverse Probability of Treatment Weighting (IPTW)

|                       | Adjusted rates of MA enrollment                                                                       |                                                               |                                                                                                            |                                                                                            |                                                              |                                                                                                            |                                                                            |                                                                  |                                                                                                                         |
|-----------------------|-------------------------------------------------------------------------------------------------------|---------------------------------------------------------------|------------------------------------------------------------------------------------------------------------|--------------------------------------------------------------------------------------------|--------------------------------------------------------------|------------------------------------------------------------------------------------------------------------|----------------------------------------------------------------------------|------------------------------------------------------------------|-------------------------------------------------------------------------------------------------------------------------|
|                       | I have the information I need to make an informed comparison among different health insurance choices |                                                               |                                                                                                            | How easy would you say it is for you to review and compare your Medicare coverage options? |                                                              |                                                                                                            | How often do you review or compare your Medicare coverage options?         |                                                                  |                                                                                                                         |
|                       | <u>Adjusted rate of MA enrollment</u> for “disagree”, % (95% CI)                                      | <u>Adjusted rate of MA enrollment</u> for “agree”, % (95% CI) | <u>Difference in adjusted rate of MA enrollment</u> for “agree” from “disagree”, percentage point (95% CI) | <u>Adjusted rate of MA enrollment</u> for “difficult”, % (95% CI)                          | <u>Adjusted rate of MA enrollment</u> for “easy”, % (95% CI) | <u>Difference in adjusted rate of MA enrollment</u> for “easy” from “difficult”, percentage point (95% CI) | <u>Adjusted rate of MA enrollment</u> for “less than annually”, % (95% CI) | <u>Adjusted rate of MA enrollment</u> for “annually”, % (95% CI) | <u>Difference in adjusted rate of MA enrollment</u> for “annually” from “less than annually”, percentage point (95% CI) |
| Without IPTW matching | 29.2 (26.0 to 32.5)                                                                                   | 33.6 (32.1 to 35.0)                                           | 4.3 (0.7 to 8.0)                                                                                           | 30.9 (28.5 to 33.2)                                                                        | 33.8 (32.1 to 35.5)                                          | 3.0 (0.0 to 5.9)                                                                                           | 27.8 (25.8 to 29.7)                                                        | 38.0 (36.0 to 40.1)                                              | 10.3 (7.4 to 13.2)                                                                                                      |
| With IPTW matching    | 46.8 (42.9 to 50.7)                                                                                   | 50.5 (48.7 to 52.3)                                           | 3.7 (-0.6 to 8.0)                                                                                          | 47.8 (45.1 to 50.6)                                                                        | 50.9 (48.9 to 52.9)                                          | 3.0 (-0.5 to 6.5)                                                                                          | 43.8 (41.4 to 46.1)                                                        | 55.8 (53.5 to 58.1)                                              | 12.0 (8.6 to 15.4)                                                                                                      |

Abbreviation: MA, Medicare Advantage; IPTW, inverse probability of treatment weighting.

**eTable 4.** Results From Conditional Logistic Regression of Enrollment in Medicare Advantage (MA)

| Variable                                                                                                      | MA enrollment, OR (95% CI)  |         |         |
|---------------------------------------------------------------------------------------------------------------|-----------------------------|---------|---------|
|                                                                                                               | Model 1                     | Model 2 | Model 3 |
| I have the information I need to make an informed comparison among different health insurance choices [Agree] | 0.55 (0.12 to 2.47)         |         |         |
| Star rating                                                                                                   |                             |         |         |
| 2-2.5 stars                                                                                                   | REF                         |         |         |
| 3-3.5 stars                                                                                                   | 1.96 (0.59 to 6.44)         |         |         |
| 4-4.5 stars                                                                                                   | 2.82 (0.86 to 9.21)         |         |         |
| 5 stars                                                                                                       | <b>7.27 (1.93 to 27.38)</b> |         |         |
| Unrated                                                                                                       | 0.64 (0.16 to 2.56)         |         |         |
| Interaction between star rating and “agree”                                                                   |                             |         |         |
| 2-2.5 stars                                                                                                   | REF                         |         |         |
| 3-3.5 stars                                                                                                   | 1.59 (0.4 to 6.39)          |         |         |
| 4-4.5 stars                                                                                                   | 1.69 (0.42 to 6.73)         |         |         |
| 5 stars                                                                                                       | 1.64 (0.36 to 7.55)         |         |         |
| Unrated                                                                                                       | 0.86 (0.17 to 4.36)         |         |         |
| Monthly premium                                                                                               | 0.99 (0.99 to 1)            |         |         |
| Interaction between monthly premium and “agree”                                                               | <b>1 (1 to 1)</b>           |         |         |
| Maximum out-of-pocket limit                                                                                   | <b>1 (1 to 1)</b>           |         |         |
| Interaction between maximum out-of-pocket limit and “agree”                                                   | <b>1 (1 to 1)</b>           |         |         |
| Plan type                                                                                                     |                             |         |         |
| HMO                                                                                                           | REF                         |         |         |
| Local PPO                                                                                                     | <b>0.59 (0.41 to 0.85)</b>  |         |         |
| Regional PPO                                                                                                  | 0.79 (0.47 to 1.31)         |         |         |
| Other                                                                                                         | 0.68 (0.21 to 2.22)         |         |         |
| Interaction between plan type and “agree”                                                                     |                             |         |         |
| HMO                                                                                                           | REF                         |         |         |
| Local PPO                                                                                                     | 1.11 (0.74 to 1.65)         |         |         |
| Regional PPO                                                                                                  | 1.14 (0.65 to 1.99)         |         |         |
| Other                                                                                                         | 0.94 (0.27 to 3.34)         |         |         |
| Supplemental benefits                                                                                         |                             |         |         |
| Prescription gap coverage                                                                                     | <b>3.06 (2.18 to 4.3)</b>   |         |         |
| Dental coverage                                                                                               | 0.92 (0.44 to 1.9)          |         |         |
| Vision coverage                                                                                               | 0.89 (0.4 to 1.99)          |         |         |
| Interaction between supplemental benefits and “agree”                                                         |                             |         |         |
| Prescription gap coverage                                                                                     | 1.09 (0.75 to 1.58)         |         |         |
| Dental coverage                                                                                               | 0.98 (0.5 to 1.93)          |         |         |

|                                                                                                   |                     |                              |  |
|---------------------------------------------------------------------------------------------------|---------------------|------------------------------|--|
| Vision coverage                                                                                   | 1.04 (0.52 to 2.07) |                              |  |
|                                                                                                   |                     |                              |  |
|                                                                                                   |                     |                              |  |
| How easy would you say it is for you to review and compare your Medicare coverage options? [Easy] |                     | 1.32 (0.3 to 5.7)            |  |
| Star rating                                                                                       |                     |                              |  |
| 2-2.5 stars                                                                                       |                     | REF                          |  |
| 3-3.5 stars                                                                                       |                     | <b>3.38 (1.05 to 10.87)</b>  |  |
| 4-4.5 stars                                                                                       |                     | <b>4.86 (1.52 to 15.58)</b>  |  |
| 5 stars                                                                                           |                     | <b>11.29 (3.28 to 38.81)</b> |  |
| Unrated                                                                                           |                     | 0.81 (0.22 to 2.98)          |  |
| Interaction between star rating and “easy”                                                        |                     |                              |  |
| 2-2.5 stars                                                                                       |                     | REF                          |  |
| 3-3.5 stars                                                                                       |                     | 0.77 (0.19 to 3.02)          |  |
| 4-4.5 stars                                                                                       |                     | 0.82 (0.21 to 3.24)          |  |
| 5 stars                                                                                           |                     | 0.94 (0.22 to 4.04)          |  |
| Unrated                                                                                           |                     | 0.57 (0.12 to 2.72)          |  |
| Monthly premium                                                                                   |                     | 0.99 (0.99 to 1)             |  |
| Interaction between monthly premium and “easy”                                                    |                     | <b>1 (1 to 1)</b>            |  |
| Maximum out-of-pocket limit                                                                       |                     | <b>1 (1 to 1)</b>            |  |
| Interaction between maximum out-of-pocket limit and “easy”                                        |                     | <b>1 (1 to 1)</b>            |  |
| Plan type                                                                                         |                     |                              |  |
| HMO                                                                                               |                     | REF                          |  |
| Local PPO                                                                                         |                     | <b>0.71 (0.56 to 0.91)</b>   |  |
| Regional PPO                                                                                      |                     | 0.88 (0.62 to 1.25)          |  |
| Other                                                                                             |                     | 0.76 (0.37 to 1.56)          |  |
| Interaction between plan type and “easy”                                                          |                     |                              |  |
| HMO                                                                                               |                     | REF                          |  |
| Local PPO                                                                                         |                     | 0.86 (0.63 to 1.17)          |  |
| Regional PPO                                                                                      |                     | 0.99 (0.65 to 1.53)          |  |
| Other                                                                                             |                     | 0.78 (0.32 to 1.91)          |  |
| Supplemental benefits                                                                             |                     |                              |  |
| Prescription gap coverage                                                                         |                     | <b>2.98 (2.35 to 3.77)</b>   |  |
| Dental coverage                                                                                   |                     | 0.91 (0.54 to 1.53)          |  |
| Vision coverage                                                                                   |                     | 0.93 (0.46 to 1.87)          |  |
| Interaction between supplemental benefits and “easy”                                              |                     |                              |  |
| Prescription gap coverage                                                                         |                     | 1.16 (0.87 to 1.56)          |  |
| Dental coverage                                                                                   |                     | 0.99 (0.61 to 1.63)          |  |
| Vision coverage                                                                                   |                     | 0.98 (0.58 to 1.65)          |  |
|                                                                                                   |                     |                              |  |

|                                                                               |  |  |                             |
|-------------------------------------------------------------------------------|--|--|-----------------------------|
| How often do you review or compare your Medicare coverage options? [Annually] |  |  | 0.7 (0.19 to 2.6)           |
| Star rating                                                                   |  |  |                             |
| 2-2.5 stars                                                                   |  |  | REF                         |
| 3-3.5 stars                                                                   |  |  | <b>2.34 (1.01 to 5.4)</b>   |
| 4-4.5 stars                                                                   |  |  | <b>3.56 (1.55 to 8.19)</b>  |
| 5 stars                                                                       |  |  | <b>14.41 (5.92 to 35.1)</b> |
| Unrated                                                                       |  |  | 0.36 (0.12 to 1.04)         |
| Interaction between star rating and “agree”                                   |  |  |                             |
| 2-2.5 stars                                                                   |  |  | REF                         |
| 3-3.5 stars                                                                   |  |  | 1.43 (0.42 to 4.92)         |
| 4-4.5 stars                                                                   |  |  | 1.42 (0.42 to 4.85)         |
| 5 stars                                                                       |  |  | 0.55 (0.15 to 2.04)         |
| Unrated                                                                       |  |  | 2.12 (0.49 to 9.11)         |
| Monthly premium                                                               |  |  | 1 (0.99 to 1)               |
| Interaction between monthly premium and “agree”                               |  |  | <b>1 (1 to 1)</b>           |
| Maximum out-of-pocket limit                                                   |  |  | <b>1 (1 to 1)</b>           |
| Interaction between maximum out-of-pocket limit and “agree”                   |  |  | <b>1 (1 to 1)</b>           |
| Plan type                                                                     |  |  |                             |
| HMO                                                                           |  |  | REF                         |
| Local PPO                                                                     |  |  | <b>0.55 (0.44 to 0.7)</b>   |
| Regional PPO                                                                  |  |  | 0.82 (0.6 to 1.12)          |
| Other                                                                         |  |  | 0.56 (0.31 to 1.04)         |
| Interaction between plan type and “agree”                                     |  |  |                             |
| HMO                                                                           |  |  | REF                         |
| Local PPO                                                                     |  |  | 1.3 (0.97 to 1.75)          |
| Regional PPO                                                                  |  |  | 1.13 (0.75 to 1.71)         |
| Other                                                                         |  |  | 1.21 (0.51 to 2.85)         |
| Supplemental benefits                                                         |  |  |                             |
| Prescription gap coverage                                                     |  |  | <b>3.04 (2.46 to 3.75)</b>  |
| Dental coverage                                                               |  |  | 0.88 (0.54 to 1.43)         |
| Vision coverage                                                               |  |  | 0.93 (0.48 to 1.78)         |
| Interaction between supplemental benefits and “agree”                         |  |  |                             |
| Prescription gap coverage                                                     |  |  | 1.15 (0.87 to 1.53)         |
| Dental coverage                                                               |  |  | 1.05 (0.66 to 1.67)         |
| Vision coverage                                                               |  |  | 0.96 (0.59 to 1.56)         |

Abbreviation: TM, traditional Medicare; MA, Medicare Advantage; ADL, activities of daily living; HMO, health maintenance organization; PPO, preferred provider organization.

For each measure of health insurance literacy, logistic regression was conducted. We coded 1 for “agree” for the question “I have the information I need to make an informed comparison among different health insurance choices”, “easy” for the question “How easy would you say it is for you to review and compare your Medicare coverage options?”, and “annually” for the question “How often do you review or compare your Medicare coverage options?”

**Bold** indicates statistically significant differences ( $p < 0.05$ ).
